# Supplementary material
Source: MDPI journal article supplement (https://www.mdpi.com/2073-4344/11/2/234)
Supplement: s1 [file s1]

Supplementary Materials

## W-doped ZnO Photocatalyst for the Degradation of Glyphosate in Aqueous Solution

Mariaconcetta Russo, Giuseppina Iervolino \* and Vincenzo Vaiano

Department of Industrial Engineering, University of Salerno, via Giovanni Paolo II, 132, Fisciano, SA 84084, Italy; marrusso@unisa.it (M.R.); vvaiano@unisa.it (V.V.)

\* Correspondence: giervolino@unisa.it; Tel.: +39-089-964006; Fax: +39-089-9694057

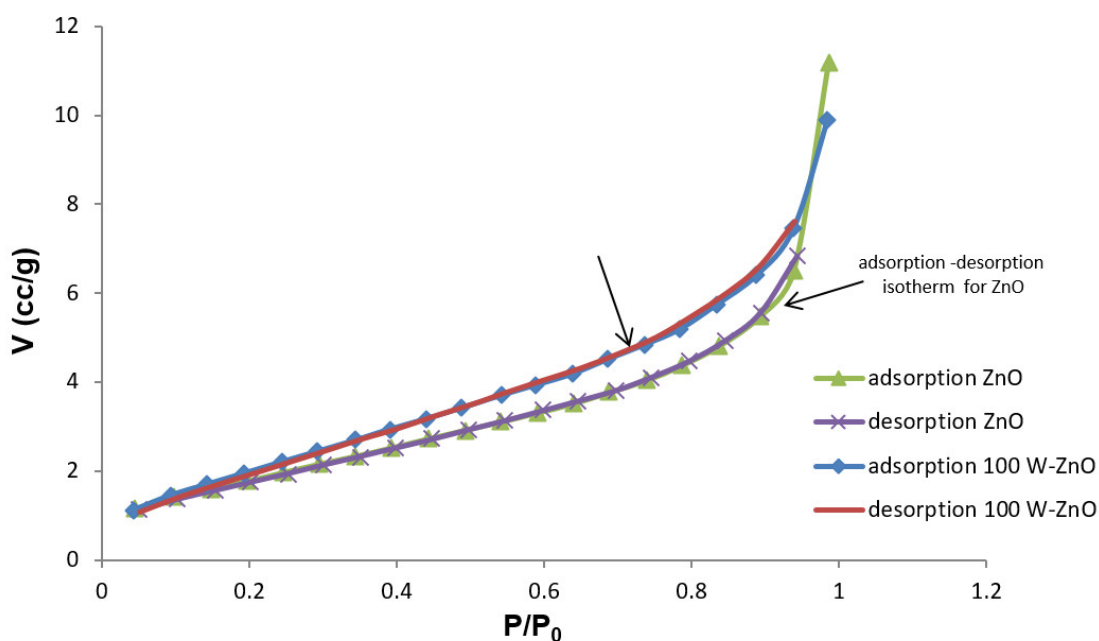

Figure S1. Full isotherm for ZnO and 100W-ZnO samples.

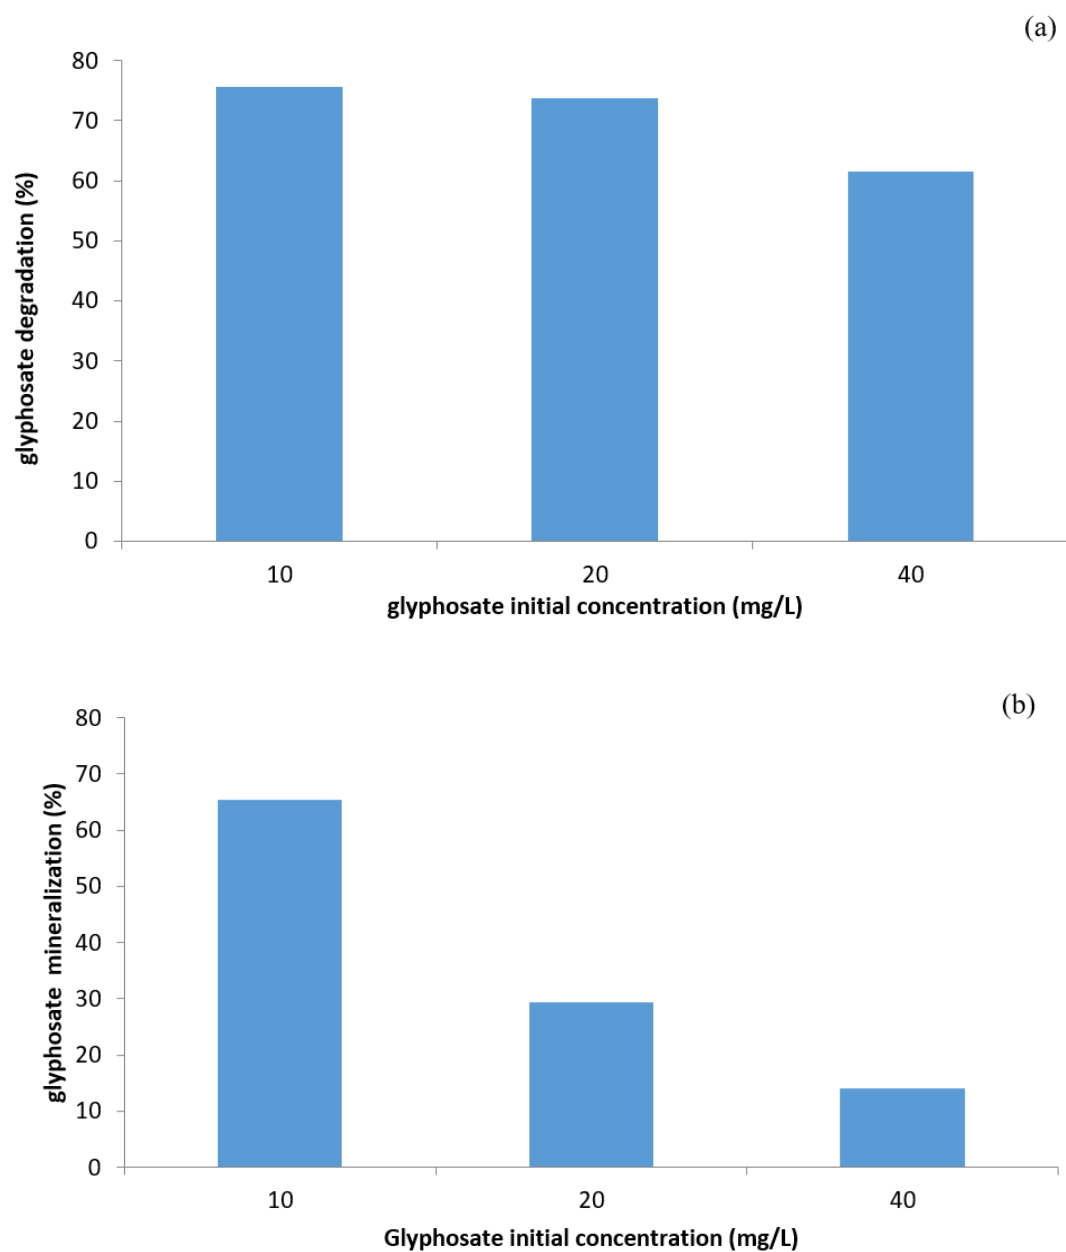

**Figure S2.** Influence of glyphosate initial concentration on degradation (a) and mineralization (b) after 180 min of solar simulated irradiation time.
